# Supplementary material
Source: publisher site journal article supplement (doi:10.18632/aging.203635)
Supplement: Supplementary file 1 [file aging-v13-203635-supplementary-material-SD1.pdf]

**SUPPLEMENTARY FIGURES**

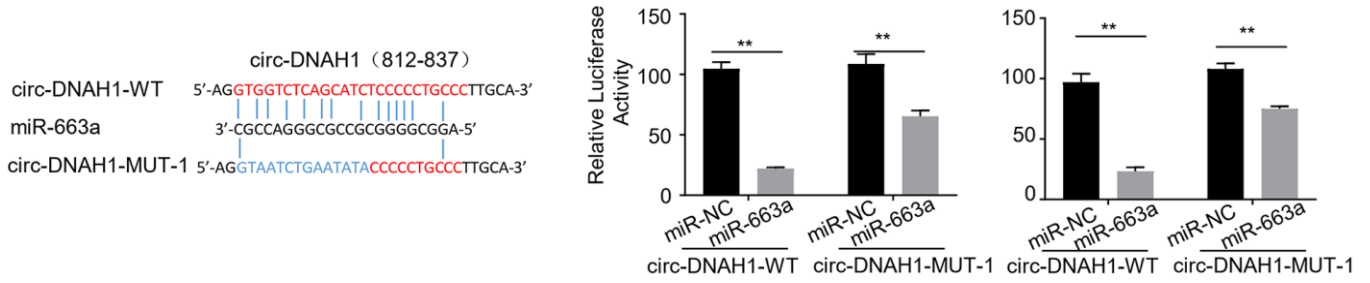

**Supplementary Figure 1. Luciferase reporter analysis of MG63 and U2OS cells transfected with wild-type circ- DNAH1 WT and circ-DNAH1-MUT1. Circ-DNAH1-MUT1 partially reversed the inhibitory effect of circ-DNAH1 on miR-663a target gene expression.**

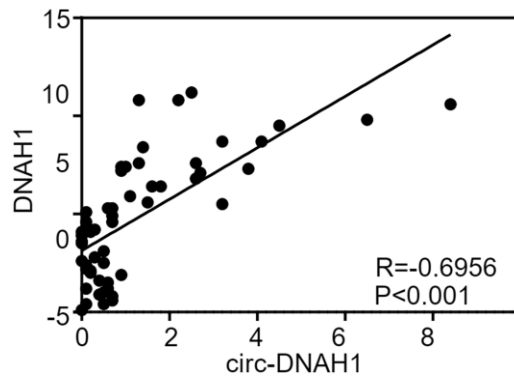

**Supplementary Figure 2. Correlation between circ-DNAH1 and linear DNAH1 mRNA expression.**
