# Supplementary material
Source: publisher site journal article supplement (doi:10.18632/aging.203635)
Supplement: Supplementary file 2 [file aging-v13-203635-supplementary-material-SD2.pdf]

## SUPPLEMENTARY TABLE

**Supplementary Table 1. Sequences of qRT-PCR primers and siRNAs.**

|                    |                            |                         |
|--------------------|----------------------------|-------------------------|
| Primers of qRT-PCR | circ-DNAH1 Forward (5'-3') | GGCTATGGAGTCCTTGTCCC    |
|                    | circ-DNAH1 Reverse (5'-3') | CCGAAGCTCCCTTCAAGACC    |
|                    | GAPDH Forward (5'-3')      | GGAGCGAGATCCCTCCAAAAT   |
|                    | GAPDH Reverse (5'-3')      | GGCTGTTGTCATACTTCTCATGG |
|                    | miR-663a Forward (5'-3')   | AGGCGGGGCGCCGCGG        |
|                    | miR-663a Reverse (5'-3')   | GTGCAGGGTCCGAGGT        |
|                    | U6 Forward (5'-3')         | CTCGCTTCGGCAGCAC        |
| siRNAs             | U6 Forward (5'-3')         | AACGCTCACGAATTTGCGT     |
|                    | circ-DNAH1                 | TTGACAATGAGGACTTTGACTGC |
|                    | NC                         | TTCTCCGAACGTGTACGT      |
